# Supplementary material
Source: Springer Nature journal article supplement (https://www.springermedizin.de/resource/supplementary/13014_2011_488_MOESM4_ESM.pdf/9633550)

Cumulative remission rate (%)

1.0  
0.8  
0.6  
0.4  
0.2  
0.0

0.0

20.0

40.0

60.0

80.0

Time (months)

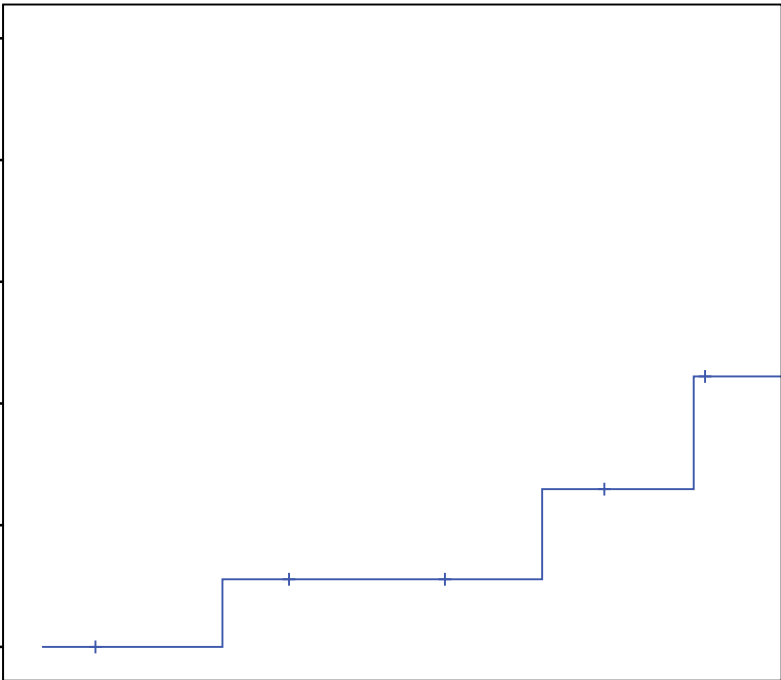

Supplement: MOESM4 [file 9633550]
